# Supplementary material
Source: publisher figshare collection journal article supplement (https://diabetesjournals.figshare.com/ndownloader/files/25946963)
Supplement: Supplementary file 1 [file 25946963]

**Table S1. comparison of baseline characteristics between 548 patients who were included and 161 patients who were excluded**

|                                                          | No (%) / median (IQR)     |                           |         |
|----------------------------------------------------------|---------------------------|---------------------------|---------|
|                                                          | Patients included (n=548) | Patients excluded (n=161) | P-value |
| <b>Age, years, median (IQR)</b>                          | 57 (39-68)                | 56 (40-71)                | 0.50    |
| <b>Male</b>                                              | 250 (46%)                 | 65 (40%)                  | 0.24    |
| <b>Symptom onset</b>                                     |                           |                           |         |
| Fever                                                    | 432 (79%)                 | 134 (83%)                 | 0.22    |
| Cough                                                    | 371 (68%)                 | 96 (60%)                  | 0.06    |
| Dyspnea                                                  | 219 (40%)                 | 63 (39%)                  | 0.85    |
| Fatigue                                                  | 201 (37%)                 | 53 (33%)                  | 0.38    |
| Muscle ache                                              | 132 (24%)                 | 34 (21%)                  | 0.43    |
| Diarrhoea                                                | 51 (9%)                   | 6 (4%)                    | 0.02    |
| Headache                                                 | 35 (6%)                   | 13 (8%)                   | 0.45    |
| Pharyngalgia                                             | 22 (4%)                   | 5 (3%)                    | 0.82    |
| <b>Comorbidities</b>                                     |                           |                           |         |
| Hypertension                                             | 197 (36%)                 | 52 (32%)                  | 0.39    |
| Diabetes                                                 | 99 (18%)                  | 25 (16%)                  | 0.46    |
| Chronic kidney disease                                   | 33 (6%)                   | 4 (2%)                    | 0.10    |
| Cardiovascular disease                                   | 53 (10%)                  | 12 (7%)                   | 0.39    |
| Cerebrovascular disease                                  | 37 (7%)                   | 6 (4%)                    | 0.16    |
| Chronic pulmonary disease                                | 32 (6%)                   | 7 (4%)                    | 0.47    |
| <b>In-hospital/admission treatment</b>                   |                           |                           |         |
| Quinolones                                               | 364 (66%)                 | 97 (60%)                  | 0.15    |
| Cephalosporins                                           | 265 (48%)                 | 73 (45%)                  | 0.50    |
| Ribavirin                                                | 487 (89%)                 | 128 (80%)                 | 0.002   |
| Oseltamivir                                              | 144 (26%)                 | 34 (21%)                  | 0.18    |
| Arbidol                                                  | 138 (25%)                 | 50 (31%)                  | 0.14    |
| Glucocorticoids                                          | 333 (61%)                 | 77 (48%)                  | 0.003   |
| Intravenous immunoglobulin                               | 285 (52%)                 | 65 (40%)                  | 0.053   |
| Ventilation                                              | 88 (16%)                  | 15 (9%)                   | 0.03    |
| <b>Blood gas analysis and severity on admission</b>      |                           |                           |         |
| Lactate, mmol/L, median (IQR)                            | 1.2 (0.8-1.9)             | 1.1 (0.7-1.7)             | 0.09    |
| PaO <sub>2</sub> :FiO <sub>2</sub> , mm Hg, median (IQR) | 343 (244-500)             | 373 (229-524)             | 0.66    |
| Disease severity                                         |                           |                           | 0.004   |
| Non-severe                                               | 312 (57%)                 | 112 (70%)                 |         |
| Severe                                                   | 236 (43%)                 | 49 (30%)                  |         |

**Table S2. Clinical features, laboratory findings, and outcomes of 99 patients with diabetes.**

| No (%) / median (IQR)                                             | Diabetes (n=99) |
|-------------------------------------------------------------------|-----------------|
| <b>Age, years, median (IQR)</b>                                   | 66 (58-72)      |
| <b>Male</b>                                                       | 53 (54%)        |
| <b>Comorbidities</b>                                              |                 |
| Hypertension                                                      | 69 (70%)        |
| Chronic kidney disease                                            | 20 (20%)        |
| Cardiovascular disease                                            | 19 (19%)        |
| Cerebrovascular disease                                           | 18 (18%)        |
| Chronic pulmonary disease                                         | 2 (2%)          |
| <b>In-hospital treatment</b>                                      |                 |
| Quinolones                                                        | 62 (63%)        |
| Cephalosporins                                                    | 50 (51%)        |
| Ribavirin                                                         | 88 (89%)        |
| Oseltamivir                                                       | 23 (23%)        |
| Arbidol                                                           | 21 (21%)        |
| Glucocorticoid therapy                                            | 30 (30%)        |
| Intravenous immunoglobulin                                        | 45 (45%)        |
| Non-invasive ventilation                                          | 20 (20%)        |
| Hypoglycemic agents                                               | 87 (88%)        |
| Biguanides                                                        | 29 (29%)        |
| $\alpha$ -glucosidase inhibitors                                  | 43 (43%)        |
| Glinides                                                          | 17 (17%)        |
| Thiazolidinediones                                                | 5 (5%)          |
| DPP-4 inhibitors                                                  | 16 (16%)        |
| Insulin therapy                                                   | 64 (65%)        |
| Insulin in combination with hypoglycemic agents                   | 43 (43%)        |
| Without any hypoglycemic treatment                                | 12 (12%)        |
| Hypoglycemia                                                      | 6 (6%)          |
| <b>Blood gas analysis and severity</b>                            |                 |
| Lactate, mmol/L, median (IQR)                                     | 1.3 (0.9-2.0)   |
| PaO <sub>2</sub> :FiO <sub>2</sub> , mm Hg, median (IQR)          | 284 (212-400)   |
| Baseline CURB-65 score, median (IQR)                              | 1 (0-2)         |
| 0                                                                 | 28 (28%)        |
| 1                                                                 | 39 (39%)        |
| 2-5                                                               | 32 (32%)        |
| <b>Disease severity status</b>                                    |                 |
| Non-severe                                                        | 38 (38%)        |
| Severe                                                            | 61 (62%)        |
| <b>Laboratory findings on admission to hospital, median (IQR)</b> |                 |
| White blood cell count, $\times 10^9/L$                           | 5.6 (4.3-7.6)   |

|                                              |                  |
|----------------------------------------------|------------------|
| Lymphocyte count, $\times 10^9/L$            | 0.9 (0.7-1.2)    |
| C-reactive protein, mg/dL                    | 3.4 (1.6-5.9)    |
| Procalcitonin, ng/mL                         | 0.10 (0.05-0.20) |
| Creatinine, $\mu\text{mol/L}$                | 74 (56-103)      |
| Alanine aminotransferase, U/L                | 21 (14-32)       |
| Fibrinogen, g/L                              | 3 (3-4)          |
| D-dimer, $\mu\text{g/L}$                     | 1.0 (0.5-2.9)    |
| Lactate dehydrogenase, U/L                   | 212 (175-270)    |
| Creatine kinase-MB, U/L                      | 9 (6-12)         |
| Glycemic parameters                          |                  |
| HbA1c, %                                     | 7.4 (6.7-8.9)    |
| <6.5 (48 mmol/mol)                           | 13/62 (21%)      |
| $\geq 6.5$ (48 mmol/mol)                     | 49/62 (79%)      |
| G <sub>0</sub>                               | 9.0 (6.7-12.3)   |
| $\leq 6.1$                                   | 23 (23%)         |
| 6.1-7.8                                      | 10 (10%)         |
| 7.8-10                                       | 26 (26%)         |
| >10                                          | 40 (40%)         |
| G <sub>peak</sub>                            | 11.3 (8.7-16.3)  |
| $\leq 6.1$                                   | 8 (8%)           |
| 6.1-7.8                                      | 11 (11%)         |
| 7.8-10                                       | 16 (16%)         |
| >10                                          | 64 (65%)         |
| G <sub>mean</sub>                            | 8.9 (6.7-11.4)   |
| $\leq 6.1$                                   | 19 (19%)         |
| 6.1-7.8                                      | 22 (22%)         |
| 7.8-10                                       | 23 (23%)         |
| >10                                          | 35 (35%)         |
| G <sub>SD</sub>                              | 2.2 (1.3-3.7)    |
| <b>Outcomes and hospitalization expenses</b> |                  |
| ARDS                                         | 54 (55%)         |
| Death                                        | 17 (17%)         |
| Length of hospital stay, days                | 30 (23-38)       |
| Hospitalization expenses, $\times 1000$ RMB  | 30 (21-55)       |

Abbreviations: ARDS=acute respiratory distress syndrome. IQR=interquartile range. PaO<sub>2</sub>=partial pressure of oxygen. FiO<sub>2</sub>=fraction of inspired oxygen. G<sub>0</sub>=admission glucose. G<sub>peak</sub>=the peak value of the first-week glucose. G<sub>mean</sub>=the mean value of the first-week glucose. G<sub>SD</sub>=standard deviation of the first-week glucose. CURB-65=Confusion, Urea>7mmol/L, Respiratory rate $\geq 30/\text{min}$ , Blood pressure (SBP<90 or DBP $\leq 60$  mmHg), Age $\geq 65$ .

Table S3. Associations of glycemic parameters with ARDS and all-cause mortality in 449 COVID-19 patients without pre-existing diabetes.

|                                            |                    | HR (95% CI) for mortality |                       |                   | RR (95% CI) for ARDS |                    |
|--------------------------------------------|--------------------|---------------------------|-----------------------|-------------------|----------------------|--------------------|
|                                            | Death<br>/total, n | Crude model               | Adjusted model*       | ARDS<br>/total, n | Crude model          | Adjusted model*    |
| <b>G<sub>0</sub>, mmol/L</b>               |                    |                           |                       |                   |                      |                    |
| ≤6.1                                       | 14/292             | 1.00 (ref.)               | 1.00 (ref.)           | 80/292            | 1.00 (ref.)          | 1.00 (ref.)        |
| 6.1-7.8                                    | 18/105             | 3.01 (1.50, 6.07)         | 1.69 (0.77, 3.70)     | 51/105            | 2.50 (1.58, 3.84)    | 2.06 (1.24, 3.50)  |
| 7.8-10                                     | 5/37               | 2.22 (0.79, 6.19)         | 2.33 (0.77, 7.01)     | 22/37             | 3.89 (1.93, 8.13)    | 3.69 (1.69, 9.32)  |
| >10                                        | 5/15               | 6.28 (2.26, 17.46)        | 2.35 (0.75, 7.36)     | 8/15              | 3.03 (1.02, 10.45)   | 1.46 (0.45, 5.03)  |
| Per SD increment of ln(G <sub>0</sub> )    |                    | 1.45 (1.19, 1.75)         | 1.23 (0.97, 1.55)     |                   | 1.69 (1.37, 2.15)    | 1.48 (1.19, 1.98)  |
| <b>G<sub>peak</sub>, mmol/L</b>            |                    |                           |                       |                   |                      |                    |
| ≤6.1                                       | 2/216              | 1.00 (ref.)               | 1.00 (ref.)           | 49/216            | 1.00 (ref.)          | 1.00 (ref.)        |
| 6.1-7.8                                    | 9/116              | 6.47 (1.40, 30.00)        | 3.17 (0.64, 15.62)    | 45/116            | 2.16 (1.35, 3.51)    | 1.80 (1.05, 3.12)  |
| 7.8-10                                     | 7/67               | 7.94 (1.65, 38.31)        | 3.13 (0.57, 17.11)    | 34/67             | 3.51 (1.98, 6.79)    | 3.01 (1.50, 6.27)  |
| >10                                        | 24/50              | 47.24 (11.16, 200.00)     | 19.89 (4.43, 89.28)   | 33/50             | 6.62 (3.31, 13.71)   | 3.24 (1.57, 7.44)  |
| Per SD increment of ln(G <sub>peak</sub> ) |                    | 2.09 (1.75, 2.49)         | 1.95 (1.52, 2.50)     |                   | 2.10 (1.71, 2.68)    | 1.70 (1.35, 2.22)  |
| <b>G<sub>mean</sub>, mmol/L</b>            |                    |                           |                       |                   |                      |                    |
| ≤6.1                                       | 7/337              | 1.00 (ref.)               | 1.00 (ref.)           | 92/337            | 1.00 (ref.)          | 1.00 (ref.)        |
| 6.1-7.8                                    | 15/75              | 8.88 (3.62, 21.78)        | 3.88 (1.39, 10.81)    | 39/75             | 2.88 (1.76, 4.98)    | 2.08 (1.17, 3.80)  |
| 7.8-10                                     | 13/28              | 23.21 (9.25, 58.27)       | 17.05 (6.56, 44.31)   | 23/28             | 12.25 (4.98, 54.89)  | 8.27 (3.37, 41.93) |
| >10                                        | 7/9                | 58.57 (20.24, 169.48)     | 45.50 (14.36, 144.21) | 7/9               | Not estimated‡       | Not estimated‡     |
| Per SD increment of ln(G <sub>mean</sub> ) |                    | 2.58 (2.12, 3.13)         | 2.31 (1.90, 2.82)     |                   | 2.17 (1.76, 2.87)    | 1.78 (1.43, 2.40)  |
| <b>G<sub>SD</sub>, mmol/L†</b>             |                    |                           |                       |                   |                      |                    |
| ≤0.4                                       | 3/112              | 1.00 (ref.)               | 1.00 (ref.)           | 23/112            | 1.00 (ref.)          | 1.00 (ref.)        |

|                                   |        |                    |                    |        |                   |                   |
|-----------------------------------|--------|--------------------|--------------------|--------|-------------------|-------------------|
| 0.4-0.7                           | 4/112  | 1.08 (0.24, 4.82)  | 0.73 (0.16, 3.29)  | 36/112 | 1.83 (1.00, 3.56) | 1.43 (0.75, 2.97) |
| 0.7-1.5                           | 8/112  | 1.92 (0.51, 7.27)  | 1.45 (0.38, 5.48)  | 43/112 | 2.41 (1.40, 4.76) | 1.76 (0.91, 3.58) |
| >1.5                              | 27/113 | 6.66 (2.02, 21.99) | 3.73 (1.12, 12.49) | 59/113 | 4.23 (2.44, 8.50) | 2.50 (1.40, 5.07) |
| Per SD increment of $\ln(G_{SD})$ |        | 2.98 (2.02, 4.40)  | 2.18 (1.40, 3.41)  |        | 1.79 (1.47, 2.33) | 1.32 (1.01, 1.80) |

\*Adjusted for age (in continuous), sex, baseline comorbidities (including chronic obstructive pulmonary disease, hypertension, chronic kidney disease, cardiovascular disease, and cerebrovascular disease), glucocorticoids use (yes/no), and baseline CURB-65 score.

†Additionally adjusted for baseline glucose level in the adjusted model.

‡The RRs and 95% CIs were not estimated because of the limited sample size in bootstrapping.

Abbreviations: ARDS=acute respiratory distress syndrome. COVID-19=coronavirus disease 2019. HR=hazard ratio. RR=risk ratio. CI=confidence interval.  $G_0$ =admission glucose.  $G_{peak}$ =the peak value of the first-week glucose.  $G_{mean}$ =the mean value of the first-week glucose.  $G_{SD}$ =standard deviation of the first-week glucose. CURB-65=Confusion, Urea>7mmol/L, Respiratory rate $\geq$ 30/min, Blood pressure (SBP<90 or DBP $\leq$ 60 mmHg), Age $\geq$ 65.

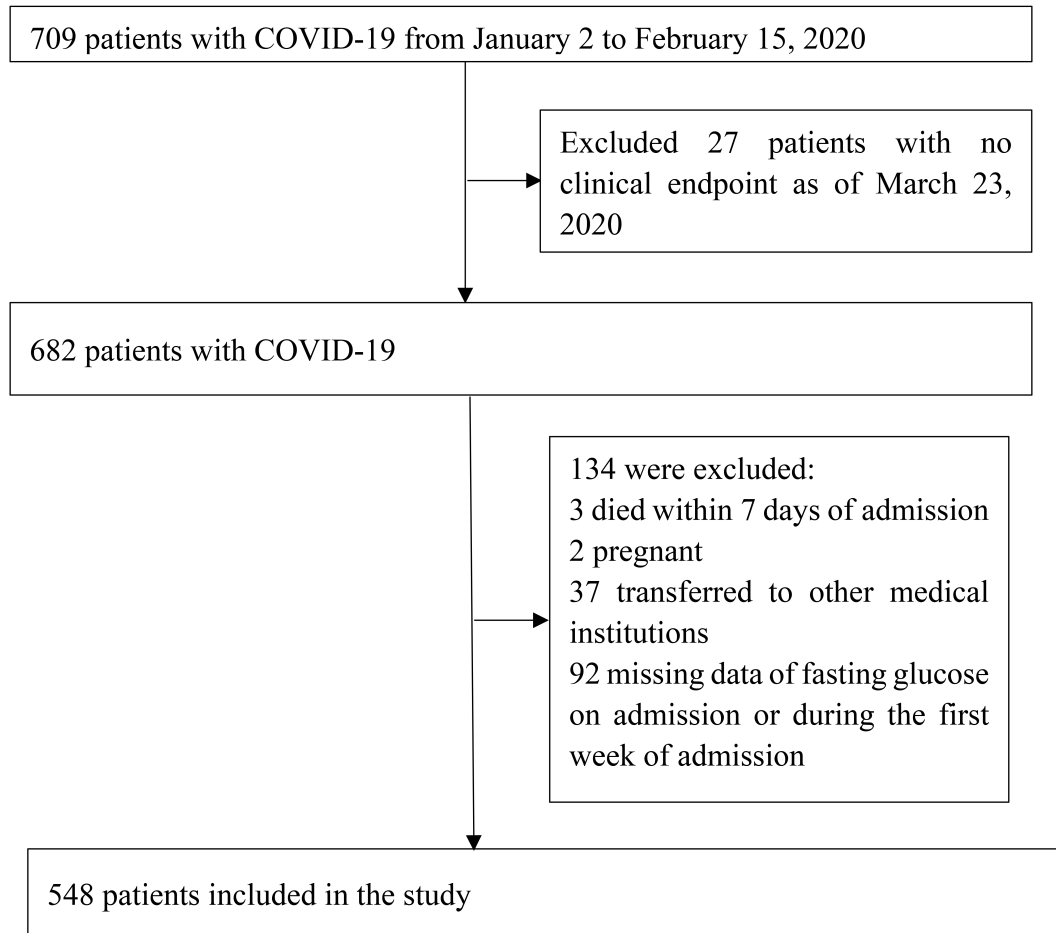

**Figure S1. Study flow diagram.**

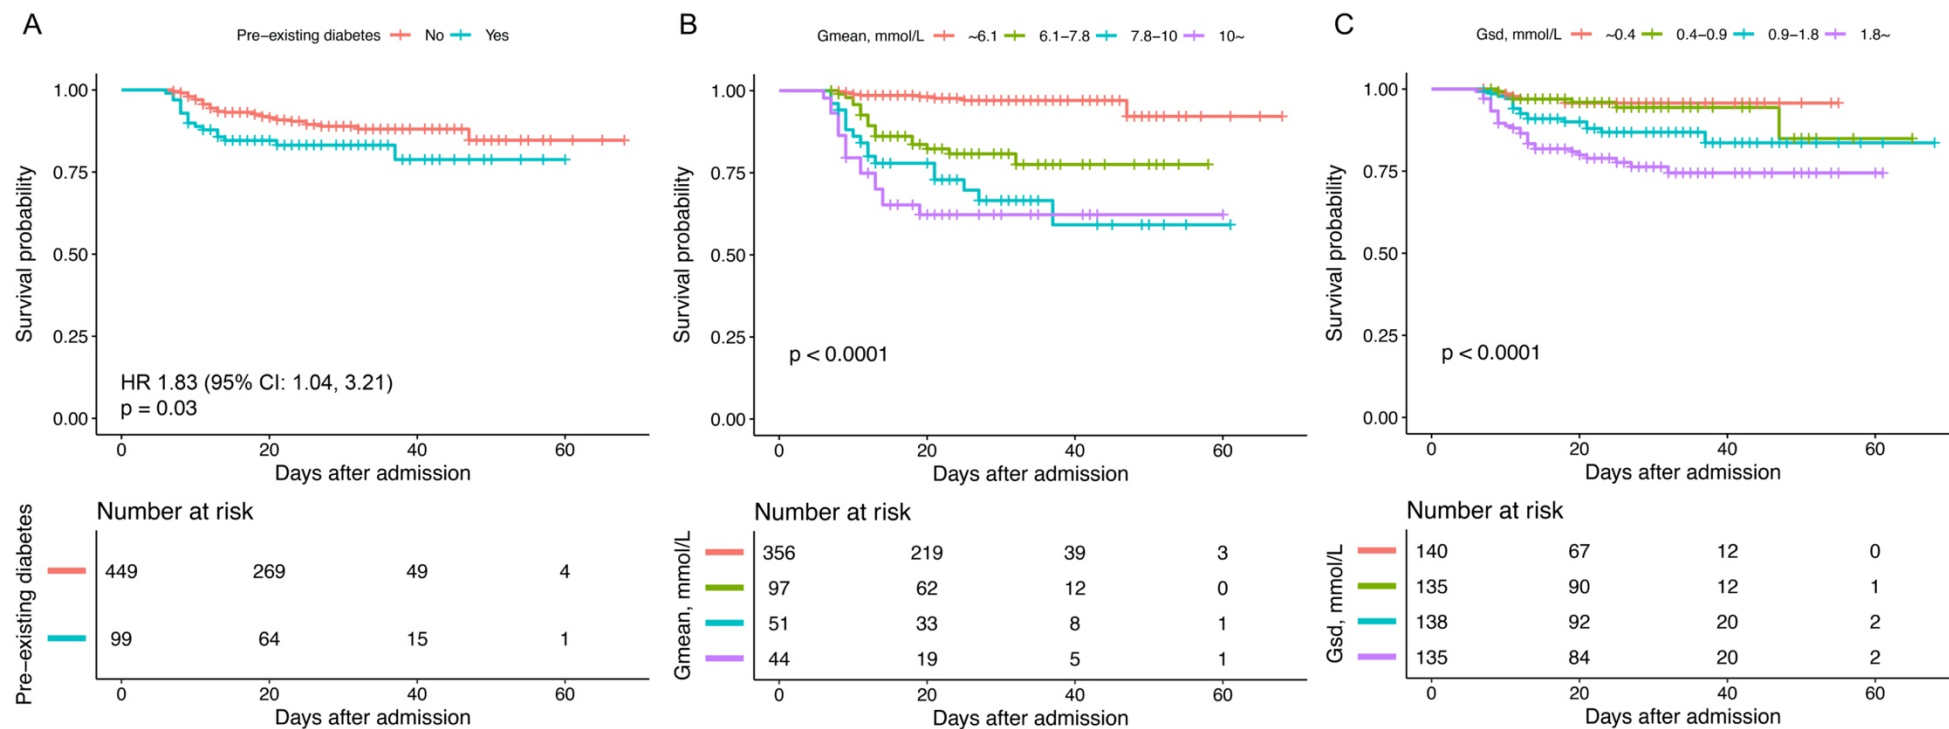

**Figure S2. Kaplan-Meier curves for cumulative probability of COVID-19 mortality for diabetes (A),  $G_{\text{mean}}$  (B), and  $G_{\text{SD}}$  (C).**

Abbreviations: CI=confidence interval.  $G_{\text{mean}}$ =the mean value of the first-week glucose.  $G_{\text{SD}}$ =standard deviation of the first-week glucose. HR=hazard ratio.

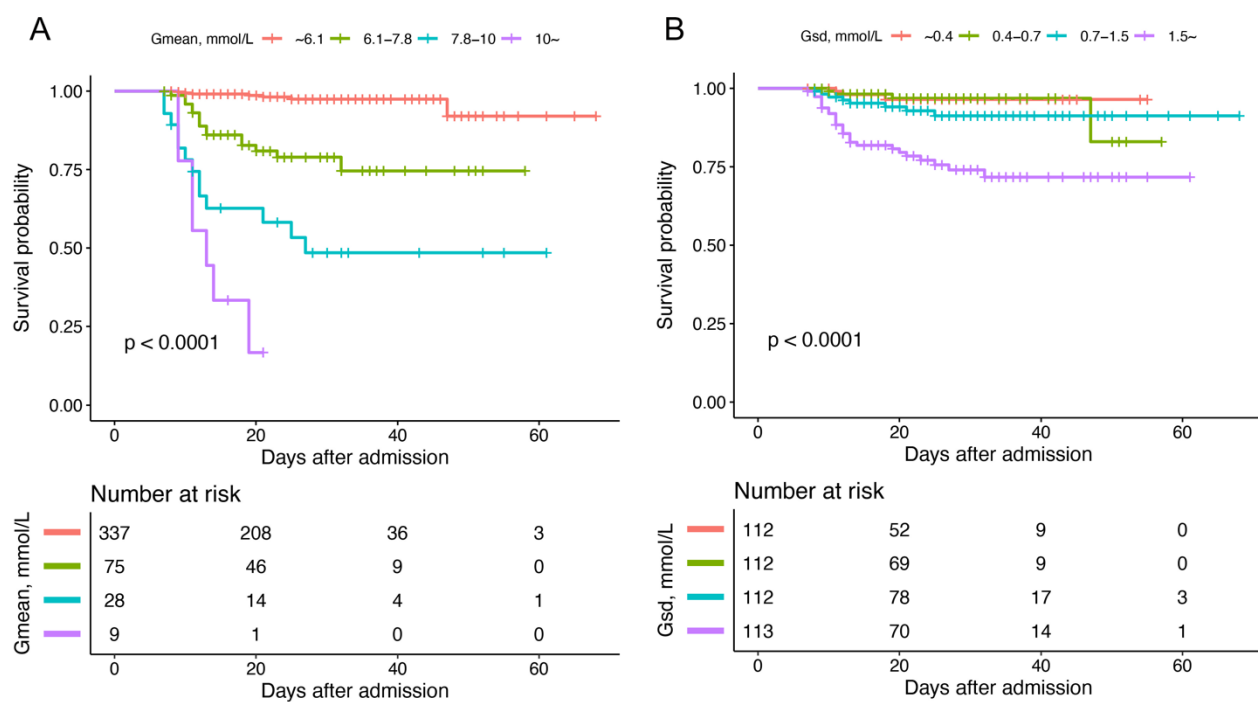

**Figure S3. Kaplan-Meier curves for cumulative probability of COVID-19 mortality for  $G_{\text{mean}}$  (A) and  $G_{\text{SD}}$  (B) among 449 COVID-19 patients without pre-existing diabetes.**

Abbreviations:  $G_{\text{mean}}$ =the mean value of the first-week glucose.  $G_{\text{SD}}$ =standard deviation of the first-week glucose.



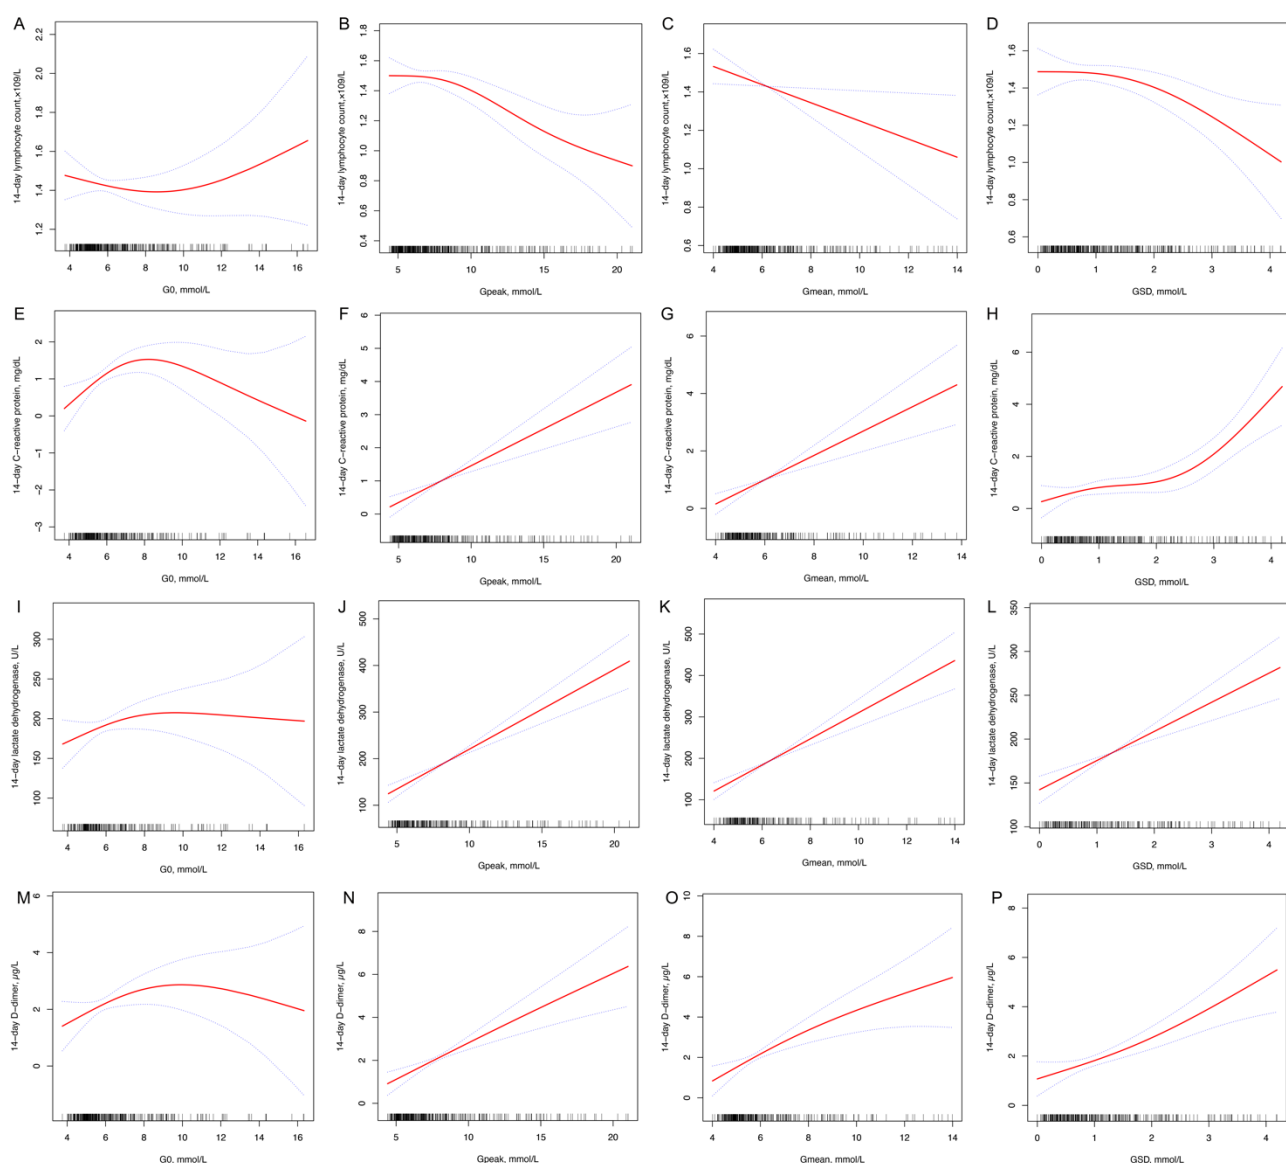

**Figure S4. Associations of glycemic parameters with 14-day lymphocyte count (A, B, C, D,  $n=415$ ), 14-day C-reactive protein levels (E, F, G, H,  $n=315$ ), 14-day lactate dehydrogenase (I, J, K, L,  $n=239$ ), and 14-day D-dimer (M, N, O, P,  $n=351$ ). Smoothing splines were generated by generalized additive models and adjusted for age, sex, comorbidities (including chronic pulmonary disease, hypertension, diabetes, cardiovascular disease, cerebrovascular disease and chronic kidney disease) and baseline CURB-65 score. The red line indicates the estimated levels of laboratory markers and the blue dot line indicates 95% confidence intervals.**

Abbreviations:  $G_0$ =admission glucose.  $G_{peak}$ =the peak value of the first-week glucose.  $G_{mean}$ =the mean value of the first-week glucose.  $G_{SD}$ =standard deviation of the first-week glucose. CURB-65=Confusion, Urea $>7$ mmol/L, Respiratory rate $\geq 30$ /min, Blood pressure (SBP $<90$  or DBP $\leq 60$  mmHg), Age $\geq 65$ .
